# Supplementary material for: Biofertilizers and Biocontrol Agents for Agriculture: How to Identify and Develop New Potent Microbial Strains and Traits
Source: PubMed Central journal article supplement (PMC8069042; doi:10.3390/microorganisms9040817), 2021-04-13
Supplement: microorganisms-09-00817-s001.pdf [file microorganisms-09-00817-s001.pdf]

**Table S1.** Microbiological tools in agriculture, available on the markets in 2021 with published field test reports.

| Name                 | Species                                                                                                                                                 | Organism type | Application   | Target                                                                                                                      | Reference                                                                                                                                                                                                                                                                                               |
|----------------------|---------------------------------------------------------------------------------------------------------------------------------------------------------|---------------|---------------|-----------------------------------------------------------------------------------------------------------------------------|---------------------------------------------------------------------------------------------------------------------------------------------------------------------------------------------------------------------------------------------------------------------------------------------------------|
| Amylo-X              | <i>Bacillus amyloliquefaciens</i>                                                                                                                       | PGPR          | biocontrol    | Controls gray mold ( <i>Botrytis cinerea</i> ), Fire blight ( <i>Erwinia amylovora</i> ) in grapes, apple, pear, strawberry | Ladurner, E., Benuzzi, M., Fiorentini, F., & Lucchi, A. (2012). Efficacy of Amylo-X®, a new fungicide/bactericide based on <i>Bacillus amyloliquefaciens</i> strain D747 for the control of microbial plant pathogens. Giornate Fitopatologiche 2012, Milano Marittima (RA), 13-16 marzo 2012, 229-236. |
| ANOKA                | <i>Trichoderma viride</i> ,<br><i>Pseudomonas fluorescens</i>                                                                                           | mix           | biocontrol    | Control of damping-off, seed and root, nematode wilt in vegetable, tuber, cotton, chilli crops                              | Woo, S. L., Ruocco, M., Vinale, F., Nigro, M., Marra, R., Lombardi, N., ... & Lorito, M. (2014). <i>Trichoderma</i> -based products and their widespread use in agriculture. The Open Mycology Journal, 8(1).                                                                                           |
| AQ10<br>Biofungicide | <i>Ampelomyces quisqualis</i> M-10                                                                                                                      | soil fungi    | biocontrol    | Controls powdery mildews in grapes, apples, aubergine, tomatoes, strawberry, cucumber                                       | Shishkoff, N., & McGrath, M. T. (2002). AQ10 biofungicide combined with chemical fungicides or AddQ spray adjuvant for control of cucurbit powdery mildew in detached leaf culture. Plant Disease, 86(8), 915-918.                                                                                      |
| Azotovit             | <i>Azotobacter chroococcum</i>                                                                                                                          | PGPR          | biofertilizer | Improves nitrogen availability in maize and broccoli                                                                        | Alafeea, R. A. A., Alamery, A. A., & Kalaf, I. T. (2019). Effect of bio fertilizers on increasing the efficiency of using chemical fertilizers on the yield component of maize ( <i>Zea mays</i> L.). Plant Archives, 19(2), 303-306.                                                                   |
| BactoFil A10         | <i>Azospirillum brasilense</i> ,<br><i>Azotobacter vinelandii</i> , <i>Bacillus megaterium</i> , <i>B. polymyxa</i> ,<br><i>Pseudomonas fluorescens</i> | mix           | biofertilizer | Improves nutrient acquisition on ryegrass                                                                                   | Katai, J., Sandor, Z., & Tallai, M. (2008). The effect of an artificial and a bacterium fertilizer on some soil characteristics and on the biomass of the rye-grass ( <i>Lolium perenne</i> L.). Cereal Research Communications, 36, 1171-1174.                                                         |
| BactoFil B10         | <i>Azospirillum brasilense</i> ,<br><i>Azotobacter vinelandii</i> , <i>Bacillus</i>                                                                     | mix           | biofertilizer | Provides higher yield of secondary metabolites in anise, coriander                                                          | Ćimović, M. G., Dolijanović, Z. K., Oljača, S. A., Kovačević, D. D., &                                                                                                                                                                                                                                  |

|               |                                                                                               |                 |               |                                                                                                                                        |                                                                                                                                                                                                                                    |
|---------------|-----------------------------------------------------------------------------------------------|-----------------|---------------|----------------------------------------------------------------------------------------------------------------------------------------|------------------------------------------------------------------------------------------------------------------------------------------------------------------------------------------------------------------------------------|
|               | <i>Megaterium</i> , <i>B. circulans</i> , <i>B. subtilis</i> , <i>Pseudomonas fluorescens</i> |                 |               |                                                                                                                                        | Oljača, M. V. (2015). Effect of organic and mineral fertilizers on essential oil content in Caraway, Anise and Coriander fruits. <i>Acta Sci. Pol., Hortorum Cultus</i> , 14(1), 95-103.                                           |
| Binab T       | <i>Trichoderma harzianum</i> , <i>T. polysporum</i>                                           | epiphytic fungi | biocontrol    | Biofungicide against soil, foliar and vascular pathogens use greenhouses, nurseries, horticultural, fruits, trees and ornamental crops | Woo, S. L., Ruocco, M., Vinale, F., Nigro, M., Marra, R., Lombardi, N., ... & Lorito, M. (2014). <i>Trichoderma</i> -based products and their widespread use in agriculture. <i>The Open Mycology Journal</i> , 8(1).              |
| Biofox C      | <i>Fusarium oxysporum</i>                                                                     | soil fungi      | biocontrol    | Against root pathogens tomato, cucumber, pepper, monocot and dicot species                                                             | Minuto, A., Migheli, Q., & Garibaldi, A. (1995). Evaluation of antagonistic strains of <i>Fusarium</i> spp. in the biological and integrated control of <i>Fusarium</i> wilt of cyclamen. <i>Crop Protection</i> , 14(3), 221-226. |
| Bio-P         | <i>Bacillus megaterium</i>                                                                    | PGPR            | biofertilizer | Improves phosphorus acquisition in tomato                                                                                              | Youssef, M. A., & Eissa, M. A. (2017). Comparison between organic and inorganic nutrition for tomato. <i>Journal of Plant Nutrition</i> , 40(13), 1900-1907.                                                                       |
| Bio-K         | <i>Frateuria aurantia</i>                                                                     | PGPR            | biofertilizer | Improves potassium acquisition in tomato                                                                                               | Youssef, M. A., & Eissa, M. A. (2017). Comparison between organic and inorganic nutrition for tomato. <i>Journal of Plant Nutrition</i> , 40(13), 1900-1907.                                                                       |
| Bio-N         | <i>Azotobacter</i> sp.                                                                        | PGPR            | biofertilizer | Improves nitrogen acquisition in tomato                                                                                                | Youssef, M. A., & Eissa, M. A. (2017). Comparison between organic and inorganic nutrition for tomato. <i>Journal of Plant Nutrition</i> , 40(13), 1900-1907.                                                                       |
| Biomonas      | <i>Pseudomonas fluorescens</i>                                                                | PGPR            | biocontrol    | Against damping-off of chilli caused by <i>Pythium aphanidermatum</i>                                                                  | Saha, S., Rai, A. B., & Pandey, S. (2011). Efficacy of seed dressing agents against damping-off disease of chilli ( <i>Capsicum frutescens</i> ). <i>Indian Journal of Agricultural Sciences</i> , 81(1), 92.                      |
| Bio-save 10LP | <i>Pseudomonas syringae</i> ESC-10, ESC-11                                                    | PGPR            | biocontrol    | Against postharvest diseases in apples, pears, lemons, oranges, or grapefruit                                                          | Bettiol W, Morandi MAB, Pinto ZV, de Paula Jr TJ, Corrêa EB, Moura AB, Lucon CMM, Costa JCB, Bezerra JL                                                                                                                            |

|                               |                                                                                                                           |                 |               |                                                                                                                           |                                                                                                                                                                                                                                                                                                              |
|-------------------------------|---------------------------------------------------------------------------------------------------------------------------|-----------------|---------------|---------------------------------------------------------------------------------------------------------------------------|--------------------------------------------------------------------------------------------------------------------------------------------------------------------------------------------------------------------------------------------------------------------------------------------------------------|
|                               |                                                                                                                           |                 |               |                                                                                                                           | (2012) Produtos comerciais à base de agentes de biocontrole de doenças de plantas, Jaguariúna, SP: Embrapa Meio Ambiente                                                                                                                                                                                     |
| Bio-Ject Spot-Less            | <i>Pseudomonas aureofaciens</i> strain Tx-1                                                                               | PGPR            | biocontrol    | Controls dollar spot, anthracnose, pythium, pink snow mold in turfgrass                                                   | Fravel, D. R. (2005). Commercialization and implementation of biocontrol. <i>Annu. Rev. Phytopathol.</i> , 43, 337-359.                                                                                                                                                                                      |
| Bioagro                       | <i>Pseudomonas fluorescens</i> , <i>Candida tropicalis</i> , <i>Bacillus amyloliquefaciens</i> , <i>Bacillus subtilis</i> | mix             | biofertilizer | Nitrogen fixation, phosphorous solubilization, organic matter mineralization                                              | Hien, N. T., Toan, P. V., Choudhury, A. T., Rose, M. T., Roughley, R. J., & Kennedy, I. R. (2014). Field application strategies for the inoculant biofertilizer BioGro supplementing fertilizer nitrogen application in rice production. <i>Journal of Plant Nutrition</i> , 37(11), 1837-1858.              |
| BioYield                      | <i>Bacillus subtilis</i> GB03, <i>Bacillus amyloliquefaciens</i> IN937a                                                   | PGPR            | biofertilizer | Increases root and shoot mass, stem caliper, and the root to shoot ratio of tomato, pepper, cucumber, tobacco, and melons | Kloepper, J. W., Gutierrez-Estrada, A., & McInroy, J. A. (2007). Photoperiod regulates elicitation of growth promotion but not induced resistance by plant growth-promoting rhizobacteria. <i>Canadian Journal of Microbiology</i> , 53(2), 159-167.                                                         |
| Blossom-Protect, Boni-Protect | <i>Aureobasidium pullulans</i> DSM 14940 (CF 10), DSM 14941 (CF 40)                                                       | epiphytic fungi | biocontrol    | Developed and registered to control postharvest diseases of apple as the product                                          | Weiss A, Mögel G (2006). Kunz S Development of “Boni-Protect”- a yeast preparation for use in the control of post-harvest diseases of apples. In: Boos M (ed) 12th International conference on cultivation technique and phytopathological problems in organic fruit-growing. Weinsberg, Germany, pp 113–117 |
| Blight Ban A506               | <i>Pseudomonas fluorescens</i> A506                                                                                       | PGPR            | biocontrol    | Against blight in fruits, tomato, potato                                                                                  | Sharifazizi, M., Harighi, B., & Sadeghi, A. (2017). Evaluation of biological control of <i>Erwinia amylovora</i> , causal agent of fire blight disease of pear by antagonistic bacteria. <i>Biological Control</i> , 104, 28-34.                                                                             |
| Botrycid                      | <i>Burkholderia vietnamiensis</i>                                                                                         | PGPR            | biocontrol    | Controls soil fungal pathogens, plant-pathogenic bacteria, and nematodes                                                  | Harman, G. E., Obregón, M. A., Samuels, G. J., & Lorito, M. (2010).                                                                                                                                                                                                                                          |

|                      |                                                   |                 |               |                                                                                                   |                                                                                                                                                                                                                                                                                                        |
|----------------------|---------------------------------------------------|-----------------|---------------|---------------------------------------------------------------------------------------------------|--------------------------------------------------------------------------------------------------------------------------------------------------------------------------------------------------------------------------------------------------------------------------------------------------------|
|                      |                                                   |                 |               |                                                                                                   | Changing models for commercialization and implementation of biocontrol in the developing and the developed world. <i>Plant Disease</i> , 94(8), 928-939.                                                                                                                                               |
| Botrybel             | <i>Bacillus velezensis</i>                        | PGPR            | biocontrol    | Controls gray mold ( <i>Botrytis cinerea</i> )                                                    | Fernández, A., Villaverde, M., Casanova, J., Malo, J., Nicolas, J. A., & Blanca, I. (2004). Nuevo aislado de <i>Bacillus</i> y su utilización para el control de hongos fitopatógenos. <i>Agroecología. net</i> , 6, 50-57.                                                                            |
| CataPult SuperFine   | <i>Glomus intraradices</i> , <i>Bacillus</i> spp. | mix             | biofertilizer | Phosphorous solubilization and mineralization, drought resistance in cereals, tree and vine crops | Mishra, J., & Arora, N. K. (2016). Bioformulations for plant growth promotion and combating phytopathogens: a sustainable approach. In <i>Bioformulations: For sustainable agriculture</i> (pp. 3-33). Springer, New Delhi.                                                                            |
| Cedomon, Cedress     | <i>Pseudomonas chlororapsis</i>                   | PGPR            | biocontrol    | Against leaf stripe, net blotch, <i>Fusarium</i> spp., spot blotch, leaf spot in barley and oats  | Mehnaz, D., Wang, Q., Gross, H., Li, Y., Jahanshah, G., & Paterson, J. (2016). The contribution of genome mining strategies to the understanding of active principles of PGPR strains.                                                                                                                 |
| Ecomonas, Florezen P | <i>Pseudomonas fluorescens</i>                    | PGPR            | biocontrol    | Controls sheath blight ( <i>Rhizoctonia solani</i> ) on rice                                      | Kumar, K. V. K., Raju, S. K., Reddy, M. S., Kloepper, J. W., Lawrence, K. S., Groth, D. E., ... & Binghai, D. (2009). Evaluation of commercially available PGPR for control of rice sheath blight caused by <i>Rhizoctonia solani</i> . <i>J Pure Appl Microbiol</i> , 3(2), 485-488.                  |
| Ecosom-Th            | <i>Trichoderma harzianum</i>                      | epiphytic fungi | biocontrol    | Controls <i>Sclerotinia sclerotiorum</i> on mustard ( <i>Brassica juncea</i> )                    | Yadav, M. S., Godika, S., Yadava, D. K., Ahmad, N., Mehta, N., Bhatnagar, K., ... & Chattopadhyay, C. (2019). Prioritizing components of package of integrated pest management in Indian mustard ( <i>Brassica juncea</i> ) in India for better economic benefit. <i>Crop Protection</i> , 120, 21-29. |
| Flocter WP5          | <i>Bacillus firmus</i>                            | PGPR            | biocontrol    | Controls root-knot nematodes                                                                      | Catalkaya, M., & DEVRAN, Z. (2019). Integrated management of Mi-                                                                                                                                                                                                                                       |

|                 |                                                         |            |               |                                                                                                                                                                          |                                                                                                                                                                                                                                                                                                   |
|-----------------|---------------------------------------------------------|------------|---------------|--------------------------------------------------------------------------------------------------------------------------------------------------------------------------|---------------------------------------------------------------------------------------------------------------------------------------------------------------------------------------------------------------------------------------------------------------------------------------------------|
|                 |                                                         |            |               |                                                                                                                                                                          | 1 virulent <i>Meloidogyne incognita</i> (Kofoid & White, 1919) Chitwood, 1949 (Tylenchida: Meloidogynidae) in greenhouse tomatoes. <i>Türkiye Entomoloji Dergisi</i> , 43(2), 157-169.                                                                                                            |
| FZB24           | <i>Bacillus amyloliquefaciens</i> ssp. <i>plantarum</i> | PGPR       | biofertilizer | Ornamentals, vegetables, field crops                                                                                                                                     | Gul, A., Kidoglu, F., Tüzel, Y., & Tüzel, I. H. (2008). Effects of nutrition and " <i>Bacillus amyloliquefaciens</i> " on tomato (" <i>Solanum lycopersicum</i> L.") growing in perlite. <i>Spanish Journal of Agricultural Research</i> , (3), 422-429.                                          |
| Gmax PGPR       | <i>Azotobacter</i> , <i>Pseudomonas fluorescens</i>     | mix        | biofertilizer | Field crops                                                                                                                                                              | Hafeez, F. Y., Abaid-Ullah, M., & Hassan, M. N. (2013). Plant growth-promoting rhizobacteria as zinc mobilizers: a promising approach for cereals biofortification. In <i>Bacteria in agrobiolgy: crop productivity</i> (pp. 217-235). Springer, Berlin, Heidelberg.                              |
| Jumpstart       | <i>Penicillium bilaie</i>                               | soil fungi | biofertilizer | Helps the plant in phosphate acquisition                                                                                                                                 | Leggett, M., Cross, J., Hnatoiwich, G., & Holloway, G. (2007). Challenges in commercializing a phosphate-solubilizing microorganism: <i>Penicillium bilaiae</i> , a case history. In <i>First international meeting on microbial phosphate solubilization</i> (pp. 215-222). Springer, Dordrecht. |
| Ketomium        | <i>Chaetomium cupreum</i>                               | soil fungi | biocontrol    | Biofungicide against pathogens. Used in maize, potato                                                                                                                    | Soytong, K., Kanokmedhakul, S., Kukongviriyapa, V., & Isobe, M. (2001). Application of <i>Chaetomium</i> species (Ketomium) as a new broad spectrum biological fungicide for plant disease control. <i>Fungal Divers</i> , 7, 1-15.                                                               |
| Koni, Cotans WG | <i>Coniothyrium minitans</i>                            | soil fungi | biocontrol    | Against Pathogens <i>Sclerotinia</i> , Registered for soybeans, canola, sunflower, safflower, dry edible beans, lettuce, carrots, snap beans, cabbage, tomato and celery | Butt, T. M., & Copping, L. G. (2000). <i>Fungal biological control agents</i> . <i>Pesticide Outlook</i> , 11(5), 186-191.                                                                                                                                                                        |

|                       |                                                                                                                                                                                                                                                                                                          |                        |               |                                                                                                                     |                                                                                                                                                                                                                                                                                                      |
|-----------------------|----------------------------------------------------------------------------------------------------------------------------------------------------------------------------------------------------------------------------------------------------------------------------------------------------------|------------------------|---------------|---------------------------------------------------------------------------------------------------------------------|------------------------------------------------------------------------------------------------------------------------------------------------------------------------------------------------------------------------------------------------------------------------------------------------------|
| Met52                 | <i>Metarhizium brunneum</i>                                                                                                                                                                                                                                                                              | entomopathogenic fungi | biocontrol    | Effective in reducing the abundance of <i>Ixodes scapularis</i> , the tick                                          | Fischhoff, I. R., Keesing, F., & Ostfeld, R. S. (2017). The tick biocontrol agent <i>Metarhizium brunneum</i> (= <i>M. anisopliae</i> ) (strain F52) does not reduce non-target arthropods. <i>PloS one</i> , 12(11), e0187675.                                                                      |
| Micofert              | <i>Glomus claroideum</i> ,<br><i>Acaulospora kentinensis</i> ,<br><i>Diversispora spurca</i> , <i>Glomus etunicatum</i>                                                                                                                                                                                  | mycorrhiza             | biofertilizer | Improves nutrient availability in lettuce                                                                           | Ley-Rivas, J. F., Aliagar, L., Moron, C., & Furrázola-Gómez, E. (2011). Efecto del biofertilizante MICOFERT en la producción de dos variedades de lechuga en Perú. <i>Acta Botánica Cubana</i> , (213), 36-39.                                                                                       |
| Micosat F Uno         | <i>Agrobacterium radiobacter</i> AR 39, <i>Bacillus subtilis</i> BA 41, <i>Streptomyces spp.</i> SB 14, <i>Glomus spp.</i> GB 67, <i>Funneliformis mosseae</i> GP 11, <i>G. viscosum</i> GC 41, <i>Pochonia chlamydosporia</i> PC 50 e, <i>Trichoderma harzianum</i> TH 01, <i>Pichia pastoris</i> PP 59 | mix                    | biofertilizer | Fruits, vegetables, flowers                                                                                         | Iacono, F., Conte, G., Giovannetti, G., Longo, V., & Porro, D. (2010). Esperienze in vigneto sull'uso delle micorrize. III Convegno nazionale di viticoltura: libro dei riassunti.                                                                                                                   |
| Myc 800               | <i>Rhizophagus intraradices</i>                                                                                                                                                                                                                                                                          | mycorrhiza             | biofertilizer | Improves nutrient acquisition in strawberry                                                                         | Mikiciuk, G., Sas-Paszt, L., Mikiciuk, M., Derkowska, E., Trzciński, P., Głuszek, S., ... & Rudnicka, J. (2019). Mycorrhizal frequency, physiological parameters, and yield of strawberry plants inoculated with endomycorrhizal fungi and rhizosphere bacteria. <i>Mycorrhiza</i> , 29(5), 489-501. |
| MycApply Endo, VAM 80 | <i>Glomus intraradices</i>                                                                                                                                                                                                                                                                               | mycorrhiza             | biofertilizer | Improves phosphate availability in corn                                                                             | Corkidi, L., Allen, E. B., Merhaut, D., Allen, M. F., Downer, J., Bohn, J., & Evans, M. (2004). Assessing the infectivity of commercial mycorrhizal inoculants in plant nursery conditions. <i>Journal of Environmental Horticulture</i> , 22(3), 149-154.                                           |
| Mycostop              | <i>Streptomyces griseoviridis</i> K61                                                                                                                                                                                                                                                                    | PGPR                   | biocontrol    | Controls many fungal pathogens, such as <i>Fusarium oxysporum</i> f.sp. lycopersici and <i>Verticillium dahliae</i> | Minuto, A., Spadaro, D., Garibaldi, A., & Gullino, M. L. (2006). Control of soilborne pathogens of tomato                                                                                                                                                                                            |

|               |                                                                                                         |                        |               |                                                                                                                                                                                                                         |                                                                                                                                                                                                                                                                                                             |
|---------------|---------------------------------------------------------------------------------------------------------|------------------------|---------------|-------------------------------------------------------------------------------------------------------------------------------------------------------------------------------------------------------------------------|-------------------------------------------------------------------------------------------------------------------------------------------------------------------------------------------------------------------------------------------------------------------------------------------------------------|
|               |                                                                                                         |                        |               |                                                                                                                                                                                                                         | using a commercial formulation of <i>Streptomyces griseoviridis</i> and solarization. Crop Protection, 25(5), 468-475.                                                                                                                                                                                      |
| MycoTrol      | <i>Beauveria bassiana</i> GHA                                                                           | entomopathogenic fungi | biocontrol    | Controls potato beetle larvae                                                                                                                                                                                           | Wraight, S. P., & Ramos, M. E. (2017). Characterization of the synergistic interaction between <i>Beauveria bassiana</i> strain GHA and <i>Bacillus thuringiensis morrisoni</i> strain tenebrionis applied against Colorado potato beetle larvae. Journal of invertebrate pathology, 144, 47-57.            |
| MycoUp, Resid | <i>Glomus iranicum</i> var. <i>tenuihypharum</i>                                                        | mycorrhiza             | biofertilizer | Improves phosphate availability in leaf vegetables, berries, fruit, olives, grapes, greenhouse crops and cereals.                                                                                                       | Martín, F. F., Molina, J. J., Nicolás, E. N., Alarcón, J. J., Kirchmair, M., García, F. J., ... & Bernal, C. (2017). Application of Arbuscular Mycorrhizae <i>Glomus iranicum</i> var. <i>tenuihypharum</i> var. <i>nova</i> in Intensive Agriculture: a study case. J. Agric. Sci. Technol. B, 7, 221-247. |
| Mykoflor      | <i>Rhizophagus irregularis</i> ,<br><i>Funneliformis mosseae</i> ,<br><i>Claroideoglomus etunicatum</i> | mycorrhiza             | biofertilizer | Improves nutrient acquisition in strawberry                                                                                                                                                                             | Mikiciuk, G., Sas-Paszt, L., Mikiciuk, M., Derkowska, E., Trzcíński, P., Głuszek, S., ... & Rudnicka, J. (2019). Mycorrhizal frequency, physiological parameters, and yield of strawberry plants inoculated with endomycorrhizal fungi and rhizosphere bacteria. Mycorrhiza, 29(5), 489-501.                |
| Nexy          | <i>Candida oleophila</i> I-182                                                                          | epiphytic fungi        | biocontrol    | Against a postharvest diseases, strain O has been approved as a plant protection agent in Europe in 2013 (European Commission Health & Consumers Directorate-General 2013; European Food Safety Authority (EFSA) 2015a) | Wisniewski, M., Wilson, C., Droby, S., Chalutz, E., El-Ghaouth, A., & Stevens, C. (2007). Postharvest biocontrol: new concepts and applications. Biological control: A global perspective, 262-273.                                                                                                         |
| Nitragin Gold | <i>Rhizobium meliloti</i>                                                                               | rhizobia               | biofertilizer | Provides nitrogen fixation for alfalfa, sweet clover or clover                                                                                                                                                          | Smith, R. S. (1995). Inoculant formulations and applications to meet changing needs. In Nitrogen fixation: fundamentals and applications (pp. 653-657). Springer, Dordrecht.                                                                                                                                |

|              |                                                                                                                                    |                            |               |                                                                                                                                                                   |                                                                                                                                                                                                                                                                                                          |
|--------------|------------------------------------------------------------------------------------------------------------------------------------|----------------------------|---------------|-------------------------------------------------------------------------------------------------------------------------------------------------------------------|----------------------------------------------------------------------------------------------------------------------------------------------------------------------------------------------------------------------------------------------------------------------------------------------------------|
| Nitroguard   | <i>Azospirillum brasilense</i> NAB317, <i>Azorhizobium caulinodens</i> NAB38, <i>Azoarcus indigenus</i> NAB04, <i>Bacillus</i> sp. | mix                        | biofertilizer | Nitrogen fixation, phosphate solubilization on cereals, seed rape, sugar beet, sugarcane, vegetables                                                              | Le Mire, G., Nguyen, M., Fassotte, B., du Jardin, P., Verheggen, F., Delaplace, P., & Jijakli, H. (2016). Implementing biostimulants and biocontrol strategies in the agroecological management of cultivated ecosystems. <i>Biotechnologie, Agronomie, Société et Environnement</i> .                   |
| Nitrofix     | <i>Azospirillum</i> str. Az39                                                                                                      | PGPR                       | biofertilizer | Improves nitrogen acquisition                                                                                                                                     | Okon, Y., Labandera-Gonzales, C., Lage, M., & Lage, P. (2015). Agronomic applications of <i>Azospirillum</i> and other PGPR. <i>Biological nitrogen fixation</i> , 921-933.                                                                                                                              |
| Noli         | <i>Metschnikowia fructicola</i> NRRL Y-27328                                                                                       | epiphytic fungi            | biocontrol    | A plant protection agent against fungal diseases in stone fruits, strawberries and grapes                                                                         | Kurtzman, C. P., & Droby, S. (2001). <i>Metschnikowia fructicola</i> , a new ascospore yeast with potential for biocontrol of postharvest fruit rots. <i>Systematic and applied microbiology</i> , 24(3), 395-399.                                                                                       |
| Novodor      | <i>Bacillus thuringiensis morrisoni</i>                                                                                            | entomopathogenic bacterium | biocontrol    | Controls potato beetle larvae                                                                                                                                     | Wraight, S. P., & Ramos, M. E. (2017). Characterization of the synergistic interaction between <i>Beauveria bassiana</i> strain GHA and <i>Bacillus thuringiensis morrisoni</i> strain tenebrionis applied against Colorado potato beetle larvae. <i>Journal of invertebrate pathology</i> , 144, 47-57. |
| Phylazonit-M | <i>Pseudomonas putida</i> , <i>Azotobacter chroococcum</i> , <i>Bacillus circulans</i> , <i>Bacillus megaterium</i>                | mix                        | biofertilizer | Improves phosphate availability in rice, maize                                                                                                                    | Ingle, K. P., & Padole, D. A. (2017). Phosphate solubilizing microbes: an overview. <i>Int J Curr Microbiol Appl Sci</i> , 6(1), 844-852.                                                                                                                                                                |
| Proradix     | <i>Pseudomonas</i> sp. DSMZ 13134                                                                                                  | PGPR                       | biocontrol    | Produces organic and siderophore acids, highly effective in chelating metal cations (zinc, copper and iron) in potato, tomato, cucumber, paprika, zucchini, grass | Fröhlich, A., Buddrus-Schiemann, K., Durner, J., Hartmann, A., & Von Rad, U. (2012). Response of barley to root colonization by <i>Pseudomonas</i> sp. DSMZ 13134 under laboratory, greenhouse, and field conditions. <i>Journal of Plant Interactions</i> , 7(1), 1-9.                                  |
| Rhizocare    | <i>Trichoderma viride</i>                                                                                                          | epiphytic fungi            | biocontrol    | Controls wilts and rots diseases on crops                                                                                                                         | Tanwar, A., Aggarwal, A., & Panwar, V. (2013). Arbuscular mycorrhizal                                                                                                                                                                                                                                    |

|                               |                                                                                               |            |               |                                                                                            |                                                                                                                                                                                                                                                                                                    |
|-------------------------------|-----------------------------------------------------------------------------------------------|------------|---------------|--------------------------------------------------------------------------------------------|----------------------------------------------------------------------------------------------------------------------------------------------------------------------------------------------------------------------------------------------------------------------------------------------------|
|                               |                                                                                               |            |               |                                                                                            | fungi and <i>Trichoderma viride</i> mediated <i>Fusarium</i> wilt control in tomato. <i>Biocontrol Science and Technology</i> , 23(5), 485-498.                                                                                                                                                    |
| Rhizocell                     | <i>Bacillus amyloliquefaciens</i> IT45                                                        | PGPR       | biofertilizer | Phosphorous solubilization and mineralization in vegetables, horticultural and field crops | Xie, L., Lehvavirta, S., Timonen, S., Kasurinen, J., Niemikapee, J., & Valkonen, J. P. (2018). Species-specific synergistic effects of two plant growth—promoting microbes on green roof plant biomass and photosynthetic efficiency. <i>PloS one</i> , 13(12), e0209432.                          |
| RhizoMyc, RhizoMyx, RhizoPlex | A mixture of 18 species of endo- and ectomycorrhizal fungi                                    | mycorrhiza | biofertilizer | Improves nutrient and water availability in several crops                                  | Poddar, R., Sen, A., Kundu, R., Das, H., & Bandopadhyay, P. (2020). Response of Various Mycorrhizal Inoculants on Rice Growth, Productivity and Nutrient Uptake. <i>International Journal of Bio-resource and Stress Management</i> .                                                              |
| Rhizosum N                    | <i>Azotobacter vinelandi</i> ,<br><i>Rhizophagus irregularis</i>                              | mix        | biofertilizer | Improves nitrogen and phosphate availability in several crops                              | Dal Cortivo, C., Ferrari, M., Visioli, G., Lauro, M., Fornasier, F., Barion, G., ... & Vamerali, T. (2020). Effects of seed-applied biofertilizers on rhizosphere biodiversity and growth of common wheat ( <i>Triticum aestivum</i> L.) in the field. <i>Frontiers in plant science</i> , 11, 72. |
| Rhizosum PK                   | <i>Bacillus megaterium</i> ,<br><i>Rhizophagus irregularis</i> ,<br><i>Frateuria aurantia</i> | mix        | biofertilizer | Improves phosphate and potassium availability in several crops                             | Dal Cortivo, C., Ferrari, M., Visioli, G., Lauro, M., Fornasier, F., Barion, G., ... & Vamerali, T. (2020). Effects of seed-applied biofertilizers on rhizosphere biodiversity and growth of common wheat ( <i>Triticum aestivum</i> L.) in the field. <i>Frontiers in plant science</i> , 11, 72. |
| Rhizovital 42                 | <i>Bacillus amyloliquefaciens</i>                                                             | PGPR       | biofertilizer | Vegetables, horticultural and field crops                                                  | Aćimović, M., Jaćimović, G., Oljača, S., Sharaf-Eldin, M., Đukanović, L., & Vuga-Janjatović, V. (2011). Efficacy (ie Efficacy) of biofertilizers on seed germination and yield of caraway,                                                                                                         |

|                   |                                                                                                                                          |                 |               |                                                                                                                                              |                                                                                                                                                                                                                                                                                                         |
|-------------------|------------------------------------------------------------------------------------------------------------------------------------------|-----------------|---------------|----------------------------------------------------------------------------------------------------------------------------------------------|---------------------------------------------------------------------------------------------------------------------------------------------------------------------------------------------------------------------------------------------------------------------------------------------------------|
|                   |                                                                                                                                          |                 |               |                                                                                                                                              | anise and coriander. <i>Annales of Scientific Work</i> .                                                                                                                                                                                                                                                |
| Rizofos Liq Maiz  | <i>Pseudomonas fluorescens</i>                                                                                                           | PGPR            | biofertilizer | Phosphorous solubilization and mineralization, production of phytohormones, siderophore and antibiotics in maize, wheat                      | Deambrosi, E., Méndez, R., & Avila, S. (2004). Evaluación de efectos del uso de rizofos en el cultivo de arroz. INIA Serie Actividades de Difusión.                                                                                                                                                     |
| Romeo, Cerevisane | <i>Saccharomyces cerevisiae</i>                                                                                                          | epiphytic fungi | biocontrol    | Preventive inducer of systemic resistance against powdery and downy mildew in grapes, fruits and vegetables                                  | De Miccolis Angelini, R. M., Rotolo, C., Gerin, D., Abate, D., Pollastro, S., & Faretra, F. (2019). Global transcriptome analysis and differentially expressed genes in grapevine after application of the yeast-derived defense inducer cerevisane. <i>Pest management science</i> , 75(7), 2020-2033. |
| Rotstop S         | <i>Phlebiopsis gigantea</i>                                                                                                              | saprophyte      | biocontrol    | Pathogen <i>Heterobasidion annosum</i> in conifer trees                                                                                      | Sun, H., Paulin, L., Alatalo, E., & Asiegbu, F. O. (2011). Response of living tissues of <i>Pinus sylvestris</i> to the saprotrophic biocontrol fungus <i>Phlebiopsis gigantea</i> . <i>Tree Physiology</i> , 31(4), 438–451                                                                            |
| Serenade          | <i>Bacillus subtilis</i>                                                                                                                 | PGPR            | biocontrol    | Against <i>Botrytis</i> bunch rot, brown rot, Powdery mildew (grapes, apple, tomato, onion, citrus, peach, pear)                             | Matheron, M. E., & Porchas, M. (2000). Evaluation of fungicide performance for control of powdery mildew on lettuce in 2000.                                                                                                                                                                            |
| SoilGard          | <i>Gliocladium virens</i>                                                                                                                | soil fungi      | biocontrol    | Controls damping-off of zinnia, cotton, and cabbage caused by <i>Pythium ultimum</i> or <i>Rhizoctonia solani</i> in nonsterile soilless mix | Lumsden, R. D., & Walter, J. F. (1996). Development of <i>Gliocladium virens</i> for damping-off disease control. <i>Canadian Journal of Plant Pathology</i> , 18(4), 463-468.                                                                                                                          |
| Sonata            | <i>Bacillus pumilus</i> QST 2028                                                                                                         | PGPR            | biocontrol    | Against powdery mildew, downy mildew, blight, and soyabean rust (grapes, strawberry, pome fruits)                                            | Borriss, R. (2011). Use of plant-associated <i>Bacillus</i> strains as biofertilizers and biocontrol agents in agriculture. In <i>Bacteria in agrobiolgy: Plant growth responses</i> (pp. 41-76). Springer, Berlin, Heidelberg.                                                                         |
| Suma Grow         | 14 bacterial ( <i>Rhizobium spp.</i> , <i>Pseudomonas spp.</i> , <i>Bacillus spp.</i> ) and 7 fungal species ( <i>Trichoderma spp.</i> ) | mix             | biofertilizer | Improves nutrient acquisition in several crops (corn, sorghum, rice, pea, okra, peanut, pea, beans, squash, tomato, clover)                  | Janarthanam, L. (2013). Bioprotectant with multifunctional microorganisms: A new dimension in plant protection. <i>Journal of Biopesticides</i> , 6(2), 219.                                                                                                                                            |

|               |                                                          |            |               |                                                                                            |                                                                                                                                                                                                                                                                                                 |
|---------------|----------------------------------------------------------|------------|---------------|--------------------------------------------------------------------------------------------|-------------------------------------------------------------------------------------------------------------------------------------------------------------------------------------------------------------------------------------------------------------------------------------------------|
| Symbion-N     | <i>Azospirillum, Rhizobium, Acetobacter, Azotobacter</i> | mix        | biofertilizer | Nitrogen fixation on field crops, vegetables                                               | Abd El Ghafour, A., Darwish, M. A., Azoz, S. N., Abd-Alla, A. M., & Elsayed, S. I. (2017). Effect of mineral, bio and organic fertilizers on productivity, essential oil composition and fruit anatomy of two dill cultivars ( <i>Anethum graveolens</i> L.). <i>Sciences</i> , 7(03), 532-550. |
| Symbion-P     | <i>Bacillus megaterium</i> var. <i>phosphaticum</i>      | PGPR       | biofertilizer | Phosphorous solubilization and mineralization in vegetables, horticultural and field crops | Abd El Ghafour, A., Darwish, M. A., Azoz, S. N., Abd-Alla, A. M., & Elsayed, S. I. (2017). Effect of mineral, bio and organic fertilizers on productivity, essential oil composition and fruit anatomy of two dill cultivars ( <i>Anethum graveolens</i> L.). <i>Sciences</i> , 7(03), 532-550. |
| Symbion-K     | <i>Frateuria aurantia</i>                                | PGPR       | biofertilizer | Potassium solubilization on horticultural and field crops                                  | Abd El Ghafour, A., Darwish, M. A., Azoz, S. N., Abd-Alla, A. M., & Elsayed, S. I. (2017). Effect of mineral, bio and organic fertilizers on productivity, essential oil composition and fruit anatomy of two dill cultivars ( <i>Anethum graveolens</i> L.). <i>Sciences</i> , 7(03), 532-550. |
| Tagteam       | <i>Penicillium bilaii, Rhizobium leguminosarum</i>       | mix        | biofertilizer | Improves nitrogen availability in cowpea                                                   | Vaishnavi, S. J., & Jeyakumar, P. (2016). Bioinoculant on microbial population, biochemical characters and yield of cowpea. <i>Environment and Ecology</i> , 34(1), 129-131.                                                                                                                    |
| Taegro        | <i>Bacillus subtilis</i>                                 | PGPR       | biocontrol    | Controls fungal diseases on apple                                                          | Nasir, M., Idress, M., Iqbal, B., Hussain, M., Mohy-ud-Din, G., & Ayub, M. (2017). Comparative efficacy of biocontrol agent <i>Bacillus subtilis</i> and fungicides against powdery mildew of apple. <i>J. Agric. Res</i> , 55(1), 75-84.                                                       |
| Trichoderma x | <i>Trichoderma asperellum</i>                            | soil fungi | biocontrol    | Controls soil fungal pathogens on seeds, roots and flowers in horticultural crops          | Woo, S. L., Ruocco, M., Vinale, F., Nigro, M., Marra, R., Lombardi, N., ... & Lorito, M. (2014). <i>Trichoderma</i> -based products and their widespread                                                                                                                                        |

|        |                                                                                                              |     |               |                                                                            |                                                                                                                                                                                                                                                                                        |
|--------|--------------------------------------------------------------------------------------------------------------|-----|---------------|----------------------------------------------------------------------------|----------------------------------------------------------------------------------------------------------------------------------------------------------------------------------------------------------------------------------------------------------------------------------------|
|        |                                                                                                              |     |               |                                                                            | use in agriculture. The Open Mycology Journal, 8(1).                                                                                                                                                                                                                                   |
| Twin N | <i>Azospirillum brasilense</i> NAB317, <i>Azorhizobium caulinodens</i> NAB38, <i>Azoarcus indigenus</i> NAB0 | mix | biofertilizer | Nitrogen fixation on cereals, seed rape, sugar beet, sugarcane, vegetables | Le Mire, G., Nguyen, M., Fassotte, B., du Jardin, P., Verheggen, F., Delaplace, P., & Jijakli, H. (2016). Implementing biostimulants and biocontrol strategies in the agroecological management of cultivated ecosystems. <i>Biotechnologie, Agronomie, Société et Environnement</i> . |
